# Supplementary material for: Construction of three-dimensional metal–organic frameworks in the presence of a tetrahedral ligand and a secondary bidentate linker
Source: Royal Society of Chemistry journal article supplement (doi:10.1039/c3ce40621k), 2013-01-01
Supplement: c3ce40621k.pdf [file c3ce40621k.pdf]

## Supplementary Information

# Construction of Three-Dimensional Metal-Organic Frameworks in the Presence of a Tetrahedral Ligand and a Secondary Bidentate Linker

*Lian Zhou,<sup>a,b</sup> Yun-Shan Xue,<sup>a</sup> Jun Zhang,<sup>c</sup> Hong-Bin Du<sup>\*a</sup> and Xiao-Zeng You<sup>a</sup>*

<sup>a</sup> State Key Laboratory of Coordination Chemistry, School of Chemistry and Chemical Engineering, Nanjing University, Nanjing, 210093, China.

<sup>b</sup> School of Chemical Engineering, Qinghai University, Xining, Qinghai, 810006, China.

<sup>c</sup> School of Materials and Chemical Engineering, Anhui University of Architecture, Hefei, 230601, China.

### Content

1- Selected bond lengths and angles of compounds **1-3**.

2- Powder X-ray diffraction of compounds **1-3**.

3- Additional crystallographic figures.

### 1- Selected bond lengths and angles of compounds 1-3

**Table S1** Selected bond lengths (Å) and angles (°) for **1**.

|                                         |            |                                          |            |
|-----------------------------------------|------------|------------------------------------------|------------|
| Co1—N1 <sup>iii</sup>                   | 2.030(4)   | Co1—O11 <sup>iv</sup>                    | 2.040(4)   |
| Co1—O1                                  | 2.075(3)   | Co1 <sup>vii</sup> —O9                   | 2.021(4)   |
| Co1 <sup>vi</sup> —O5                   | 1.986(3)   | Co2—O12 <sup>iv</sup>                    | 2.001(4)   |
| Co2—O2                                  | 1.998(4)   | Co2—O6 <sup>i</sup>                      | 2.117(3)   |
| Co2—O8 <sup>ii</sup>                    | 2.041(3)   | Co2—N2                                   | 2.049(4)   |
| O5 <sup>i</sup> —Co1—O9 <sup>ii</sup>   | 164.83(14) | O5 <sup>i</sup> —Co1—N1 <sup>iii</sup>   | 99.57(19)  |
| O9 <sup>ii</sup> —Co1—N1 <sup>iii</sup> | 95.38(19)  | O5 <sup>i</sup> —Co1—O11 <sup>iv</sup>   | 93.00(15)  |
| O9 <sup>ii</sup> —Co1—O11 <sup>iv</sup> | 87.32(16)  | N1 <sup>iii</sup> —Co1—O11 <sup>iv</sup> | 98.3(2)    |
| O5 <sup>i</sup> —Co1—O1                 | 87.90(15)  | O9 <sup>ii</sup> —Co1—O1                 | 88.66(15)  |
| N1 <sup>iii</sup> —Co1—O1               | 93.5(2)    | O11 <sup>iv</sup> —Co1—O1                | 167.83(15) |
| O2—Co2—O12 <sup>iv</sup>                | 163.66(15) | O12 <sup>iv</sup> —Co2—O8 <sup>ii</sup>  | 87.78(16)  |
| O2—Co2—O8 <sup>ii</sup>                 | 93.06(16)  | O12 <sup>iv</sup> —Co2—N2                | 95.99(15)  |
| O2—Co2—N2                               | 99.86(15)  | O8 <sup>ii</sup> —Co2—N2                 | 100.91(15) |
| O12 <sup>iv</sup> —Co2—O6 <sup>i</sup>  | 89.21(15)  | O2—Co2—O6 <sup>i</sup>                   | 86.31(15)  |
| N2—Co2—O6 <sup>i</sup>                  | 92.03(14)  | O8 <sup>ii</sup> —Co2—O6 <sup>i</sup>    | 166.96(14) |

Symmetry codes: (i) x, -y, 0.5+z; (ii) 0.5+x, 0.5+y, z; (iii) 0.5+x, -0.5+y, z; (iv) 0.5+x, 0.5-y, 0.5+z;

(v) -0.5+x, 0.5+y, z; (vi) x, -y, -0.5+z; (vii) -0.5+x, -0.5+y, z; (viii) -0.5+x, 0.5-y, -0.5+z.

**Table S2** Selected bond lengths (Å) and angles (°) for **2**.

|                                            |            |                                            |            |
|--------------------------------------------|------------|--------------------------------------------|------------|
| Zn1—N1 <sup>v</sup>                        | 1.985(4)   | Zn1—O5 <sup>vi</sup>                       | 2.004(4)   |
| Zn1—O11 <sup>vii</sup>                     | 2.028(4)   | Zn1—O9 <sup>viii</sup>                     | 2.037(4)   |
| Zn1—O1                                     | 2.067(4)   | Zn2—O12 <sup>vii</sup>                     | 1.993(4)   |
| Zn2—O6 <sup>vi</sup>                       | 2.104(4)   | Zn2—O8 <sup>viii</sup>                     | 2.069(4)   |
| Zn2—N2                                     | 2.008(4)   | Zn2—O2                                     | 1.982(4)   |
| N1 <sup>v</sup> —Zn1—O5 <sup>vi</sup>      | 102.33(18) | N1 <sup>v</sup> —Zn1—O11 <sup>vii</sup>    | 98.07(19)  |
| O5 <sup>vi</sup> —Zn1—O11 <sup>vii</sup>   | 90.71(18)  | N1 <sup>v</sup> —Zn1—O9 <sup>viii</sup>    | 97.76(18)  |
| O5 <sup>vi</sup> —Zn1—O9 <sup>viii</sup>   | 159.79(16) | O11 <sup>vii</sup> —Zn1—O9 <sup>viii</sup> | 88.56(19)  |
| N1 <sup>v</sup> —Zn1—O1                    | 97.66(18)  | O5 <sup>vi</sup> —Zn1—O1                   | 88.14(19)  |
| O11 <sup>vii</sup> —Zn1—O1                 | 164.10(18) | O9 <sup>viii</sup> —Zn1—O1                 | 87.09(19)  |
| O2—Zn2—O12 <sup>vii</sup>                  | 158.31(17) | O2—Zn2—N2                                  | 102.81(18) |
| O12 <sup>vii</sup> —Zn2—N2                 | 98.73(18)  | O2—Zn2—O8 <sup>viii</sup>                  | 90.01(18)  |
| O12 <sup>vii</sup> —Zn2—O8 <sup>viii</sup> | 87.79(18)  | N2—Zn2—O8 <sup>viii</sup>                  | 102.69(17) |
| O2—Zn2—O6 <sup>vi</sup>                    | 87.10(18)  | O12 <sup>vii</sup> —Zn2—O6 <sup>vi</sup>   | 88.77(18)  |
| N2—Zn2—O6 <sup>vi</sup>                    | 94.18(17)  | O8 <sup>viii</sup> —Zn2—O6 <sup>vi</sup>   | 163.11(16) |

Symmetry codes: (i) -0.5+x, 0.5+y, z; (ii) x, -y, -0.5+z; (iii) -0.5+x, -0.5+y, z; (iv) -0.5+x, 0.5-y, -0.5+z;

(v) 0.5+x, -0.5+y, z; (vi) x, -y, 0.5+z; (vii) 0.5+x, 0.5-y, 0.5+z; (viii) 0.5+x, 0.5+y, z.

**Table S3** Selected bond lengths (Å) and angles (°) for **3**.

|                                          |            |                                          |            |
|------------------------------------------|------------|------------------------------------------|------------|
| Cd1—O8 <sup>iii</sup>                    | 2.341(4)   | Cd1—O5 <sup>iv</sup>                     | 2.386(3)   |
| Cd1—O1                                   | 2.362(4)   | Cd1—O6 <sup>iv</sup>                     | 2.420(4)   |
| Cd1—O11 <sup>v</sup>                     | 2.412(4)   | Cd1—O2                                   | 2.543(3)   |
| Cd1—O12 <sup>v</sup>                     | 2.441(4)   | Cd1—O9 <sup>iii</sup>                    | 2.580(5)   |
| O8 <sup>iii</sup> —Cd1—O1                | 84.52(14)  | O8 <sup>iii</sup> —Cd1—O5 <sup>iv</sup>  | 134.59(16) |
| O1—Cd1—O5 <sup>iv</sup>                  | 124.20(13) | O8 <sup>iii</sup> —Cd1—O11 <sup>v</sup>  | 91.14(14)  |
| O1—Cd1—O11 <sup>v</sup>                  | 137.92(18) | O5 <sup>iv</sup> —Cd1—O11 <sup>v</sup>   | 87.52(15)  |
| O8 <sup>iii</sup> —Cd1—O6 <sup>iv</sup>  | 169.37(15) | O1—Cd1—O6 <sup>iv</sup>                  | 85.15(14)  |
| O5 <sup>iv</sup> —Cd1—O6 <sup>iv</sup>   | 54.63(14)  | O11 <sup>v</sup> —Cd1—O6 <sup>iv</sup>   | 94.87(14)  |
| O8 <sup>iii</sup> —Cd1—O12 <sup>v</sup>  | 88.94(15)  | O1—Cd1—O12 <sup>v</sup>                  | 84.39(16)  |
| O5 <sup>iv</sup> —Cd1—O12 <sup>v</sup>   | 124.62(15) | O11 <sup>v</sup> —Cd1—O12 <sup>v</sup>   | 53.64(16)  |
| O6 <sup>iv</sup> —Cd1—O12 <sup>v</sup>   | 87.59(14)  | O8 <sup>iii</sup> —Cd1—O2                | 89.90(12)  |
| O1—Cd1—O2                                | 53.34(13)  | O5 <sup>iv</sup> —Cd1—O2                 | 83.77(13)  |
| O11 <sup>v</sup> —Cd1—O2                 | 168.73(17) | O6 <sup>iv</sup> —Cd1—O2                 | 85.91(12)  |
| O12 <sup>v</sup> —Cd1—O2                 | 137.61(17) | O8 <sup>iii</sup> —Cd1—O9 <sup>iii</sup> | 51.57(14)  |
| O1—Cd1—O9 <sup>iii</sup>                 | 117.98(13) | O5 <sup>iv</sup> —Cd1—O9 <sup>iii</sup>  | 83.03(15)  |
| O11 <sup>v</sup> —Cd1—O9 <sup>iii</sup>  | 90.13(15)  | O6 <sup>iv</sup> —Cd1—O9 <sup>iii</sup>  | 136.96(16) |
| O12 <sup>v</sup> —Cd1—O9 <sup>iii</sup>  | 127.80(14) | O2—Cd1—O9 <sup>iii</sup>                 | 81.74(13)  |
| O8 <sup>iii</sup> —Cd1—C17 <sup>iv</sup> | 161.0(2)   | O1—Cd1—C17 <sup>iv</sup>                 | 105.55(17) |
| O5 <sup>iv</sup> —Cd1—C17 <sup>iv</sup>  | 26.99(15)  | O11 <sup>v</sup> —Cd1—C17 <sup>iv</sup>  | 91.71(15)  |
| O6 <sup>iv</sup> —Cd1—C17 <sup>iv</sup>  | 27.65(14)  | O12 <sup>v</sup> —Cd1—C17 <sup>iv</sup>  | 107.75(17) |
| O2—Cd1—C17 <sup>iv</sup>                 | 83.76(13)  | O9 <sup>iii</sup> —Cd1—C17 <sup>iv</sup> | 109.7(2)   |
| O8 <sup>iii</sup> —Cd1—C33 <sup>v</sup>  | 90.16(16)  | O1—Cd1—C33 <sup>v</sup>                  | 111.4(2)   |
| O5 <sup>iv</sup> —Cd1—C33 <sup>v</sup>   | 106.88(19) | O11 <sup>v</sup> —Cd1—C33 <sup>v</sup>   | 26.60(17)  |
| O6 <sup>iv</sup> —Cd1—C33 <sup>v</sup>   | 91.30(16)  | O12 <sup>v</sup> —Cd1—C33 <sup>v</sup>   | 27.03(18)  |
| O2—Cd1—C33 <sup>v</sup>                  | 164.6(2)   | O9 <sup>iii</sup> —Cd1—C33 <sup>v</sup>  | 110.1(2)   |
| C17 <sup>iv</sup> —Cd1—C33 <sup>v</sup>  | 100.65(17) |                                          |            |

Symmetry codes: (i) x, 2-y, -0.5+z; (ii) 0.5+x, 1.5-y, -0.5+z; (iii) 1-x, 1-y, 2-z; (iv) x, 2-y, 0.5+z;

(v) -0.5+x, 1.5-y, 0.5+z; (vi) 1-x, y, 1.5-z.

## 2- Powder X-ray diffraction of compounds 1-3

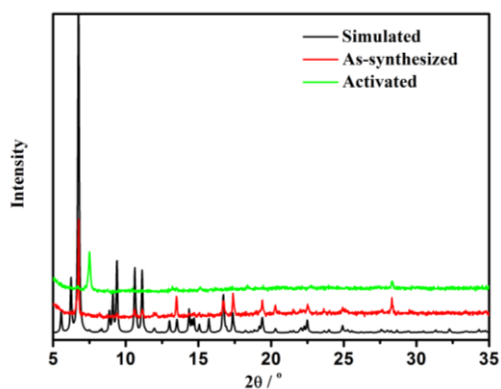

**Fig. S1.** X-ray powder diffraction patterns of compound 1.

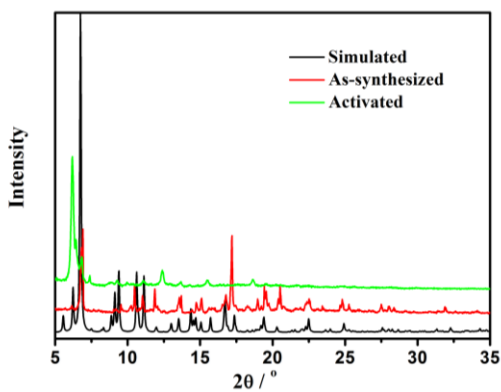

**Fig. S2.** X-ray powder diffraction patterns of compound 2.

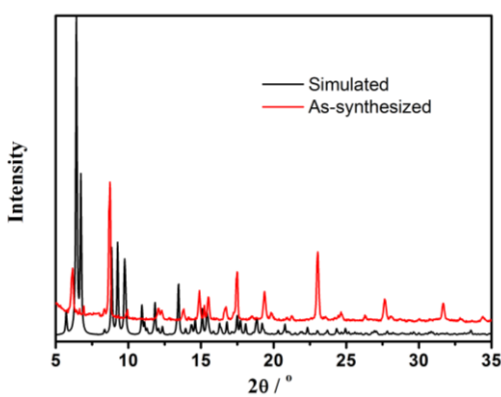

**Fig. S3.** X-ray powder diffraction patterns of compound 3.

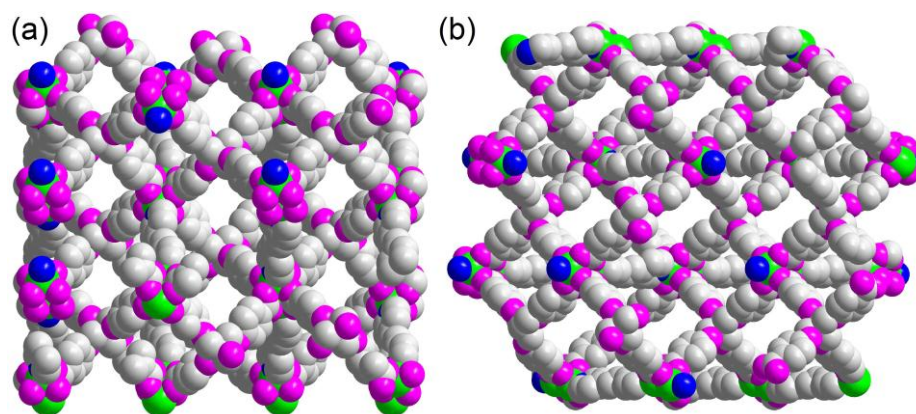

**Fig. S4** The space-filling views of **2** along the [100] and [010] directions (C, grey; N, blue; O, purple; Zn, green). Hydrogen atoms are omitted for clarity.

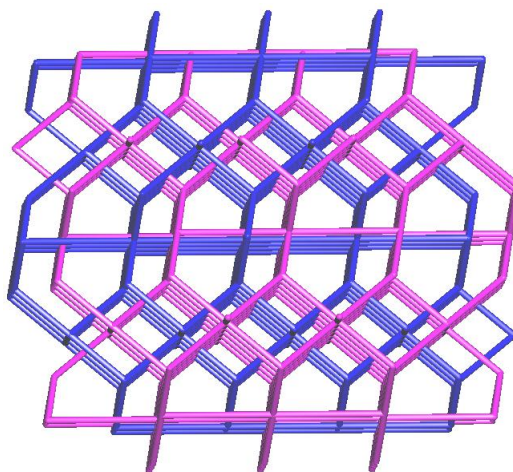

**Fig. S5.** The simplified doubly-interpenetrating (4,6)-sqc422 network of **2**.
